# Supplementary material for: Ammonium chloride mediated synthesis of alkyl glycosides and evaluation of their immunomodulatory activity
Source: Royal Society of Chemistry journal article supplement (doi:10.1039/c3ra41050a), 2013-01-01

## Supporting information:

### **Ammonium chloride mediated synthesis of alkyl glycosides and evaluation of their immunomodulatory activity**

**Deepak K. Sharma,<sup>1,2</sup> Mallikharjuna R. Lambu,<sup>1,2</sup> Tabasum Sidiq,<sup>1</sup> Anamika Khajuria,<sup>1</sup> Anil K. Tripathi,<sup>1</sup> Syed Khalid Yousuf,<sup>1</sup> Debaraj Mukherjee\*<sup>1,2</sup>**

Fax: (+) 91-191-2569111-333; Tel: +91-191-2569000-006

E-mail: dmukherjee@iiim.ac.in

|                                                                                         |              |
|-----------------------------------------------------------------------------------------|--------------|
| <b>General Information and invitro lymphocyte proliferation results:</b>                | <b>2-2</b>   |
| <b>Copies of <sup>1</sup>H NMR and <sup>13</sup>C NMR:</b>                              | <b>3-10</b>  |
| <b><sup>13</sup>C NMR of progress of reaction between propargyl alcohol and glucose</b> | <b>11-13</b> |

### **General information:**

All chemicals were purchased from Sigma-Aldrich and SD Fine Chemicals, Pvt. Ltd. India, and used as received. Loba Chemie silica gel (100-200 mesh) was used for column chromatography, and thin-layer chromatography was performed on Merck-precoated silica gel 60-F254 plates. All other chemicals and solvents were obtained from commercial sources and purified using standard methods. The  $^1\text{H}$  and  $^{13}\text{C}$  NMR spectra were recorded on a Bruker-Avance 200,400 and 500 MHz spectrometer. Chemical shifts ( $\delta$ ) are reported in parts per million, using TMS ( $\delta=0$ ) as an internal standard in  $\text{CDCl}_3$ , MeOD and DMSO. Mass spectra were recorded on a Agilent-6224-TOF ESI/MS (ESI mass spectra). All products reported showed  $^1\text{H}$  NMR and  $^{13}\text{C}$  NMR spectra in agreement with the assigned structures.

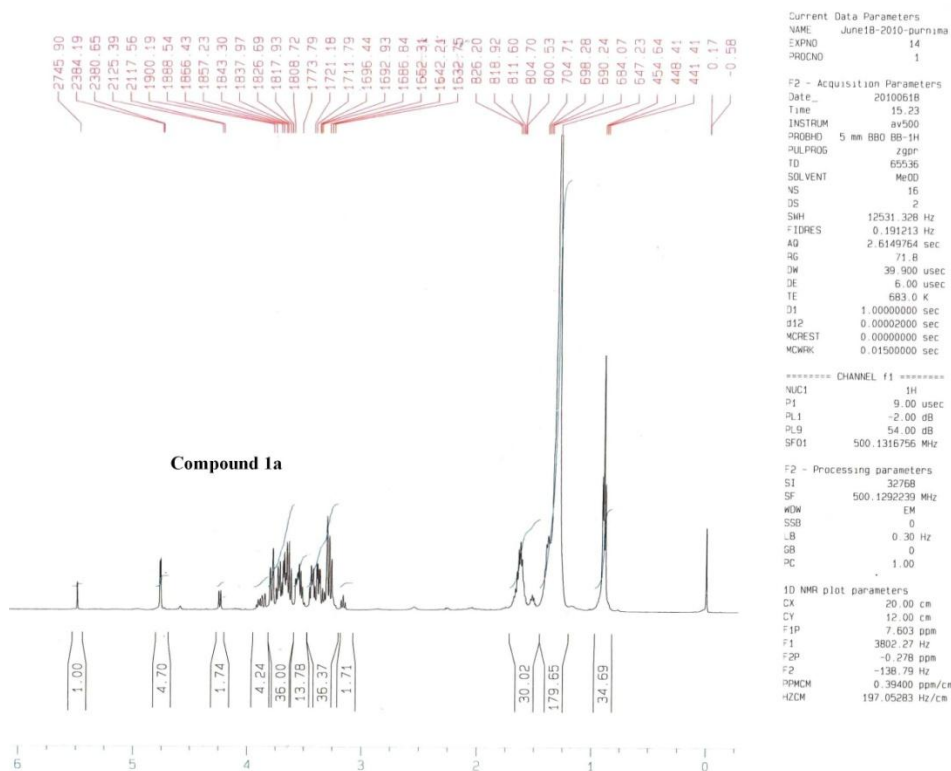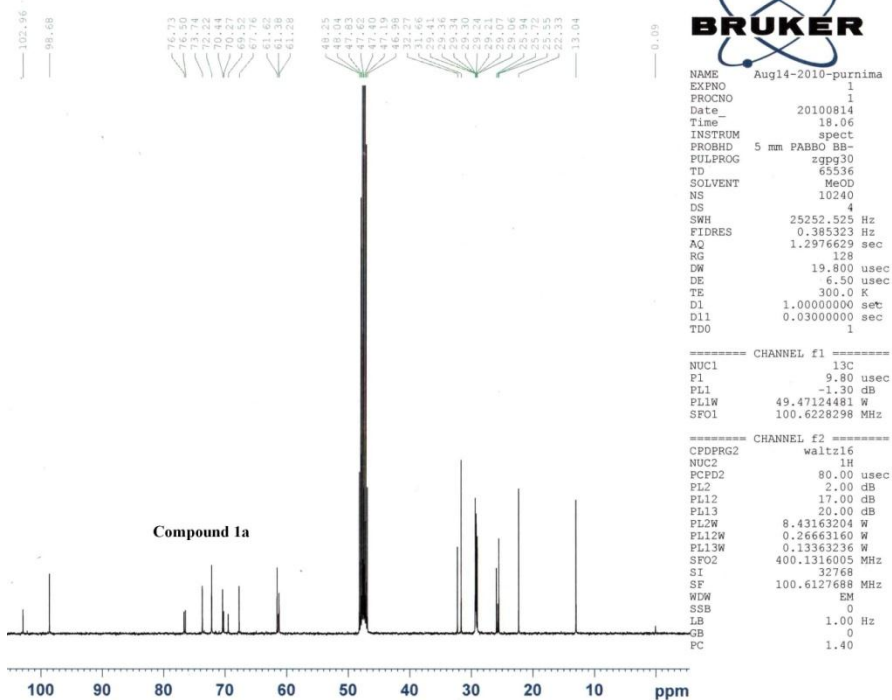

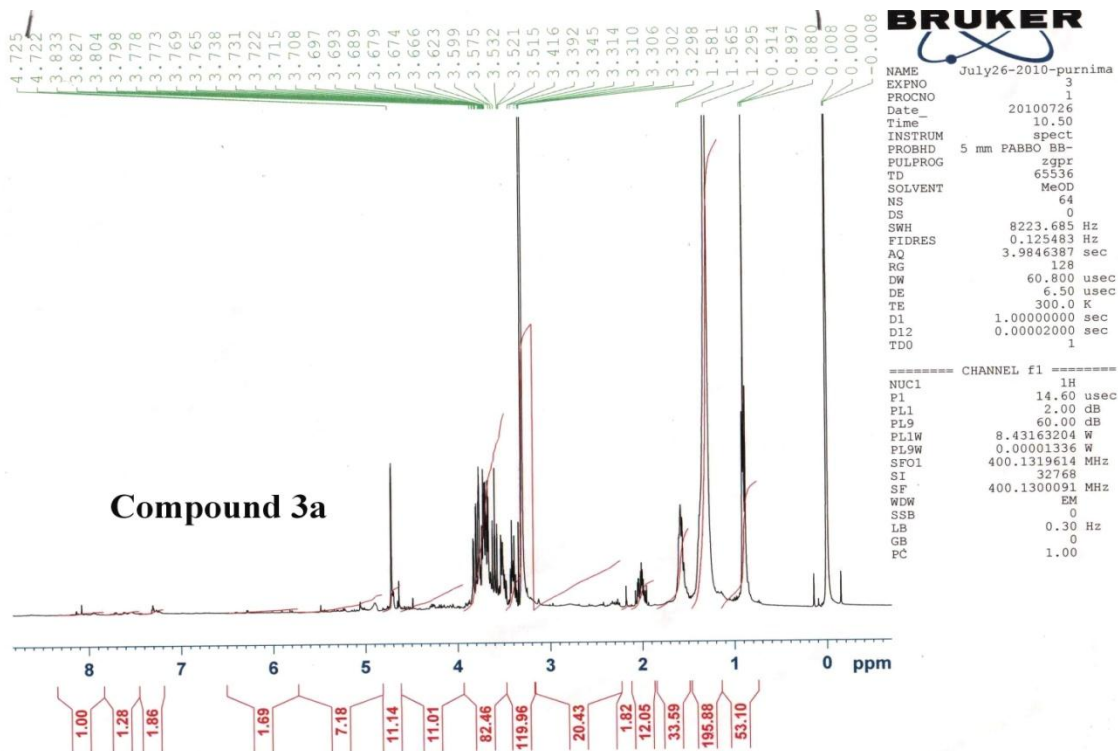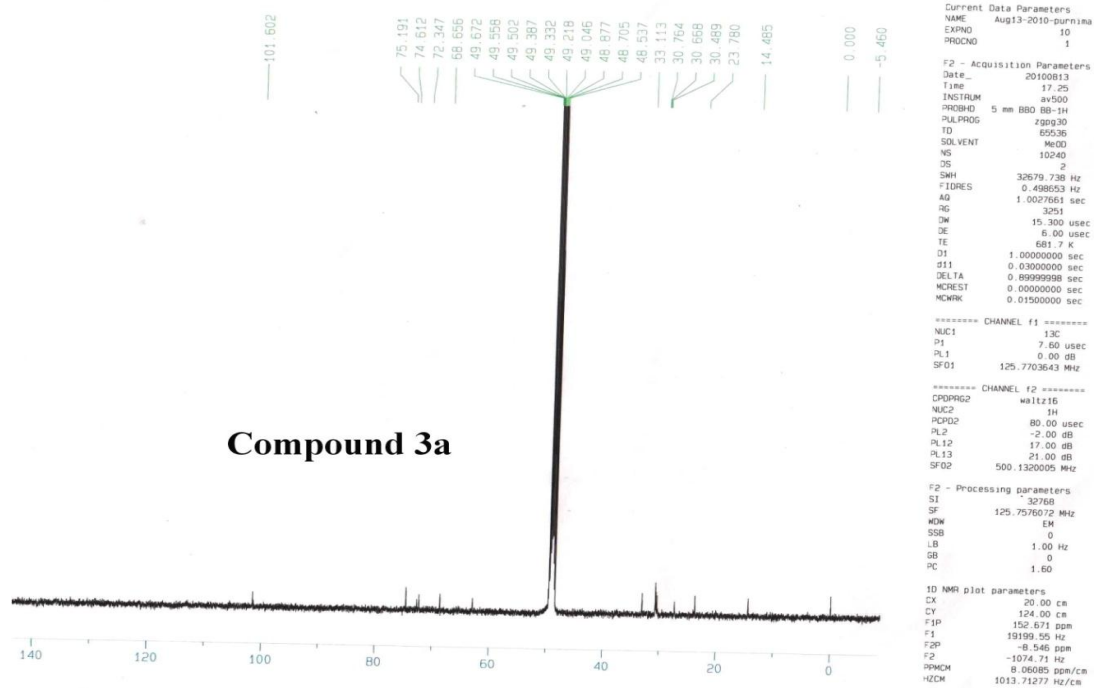

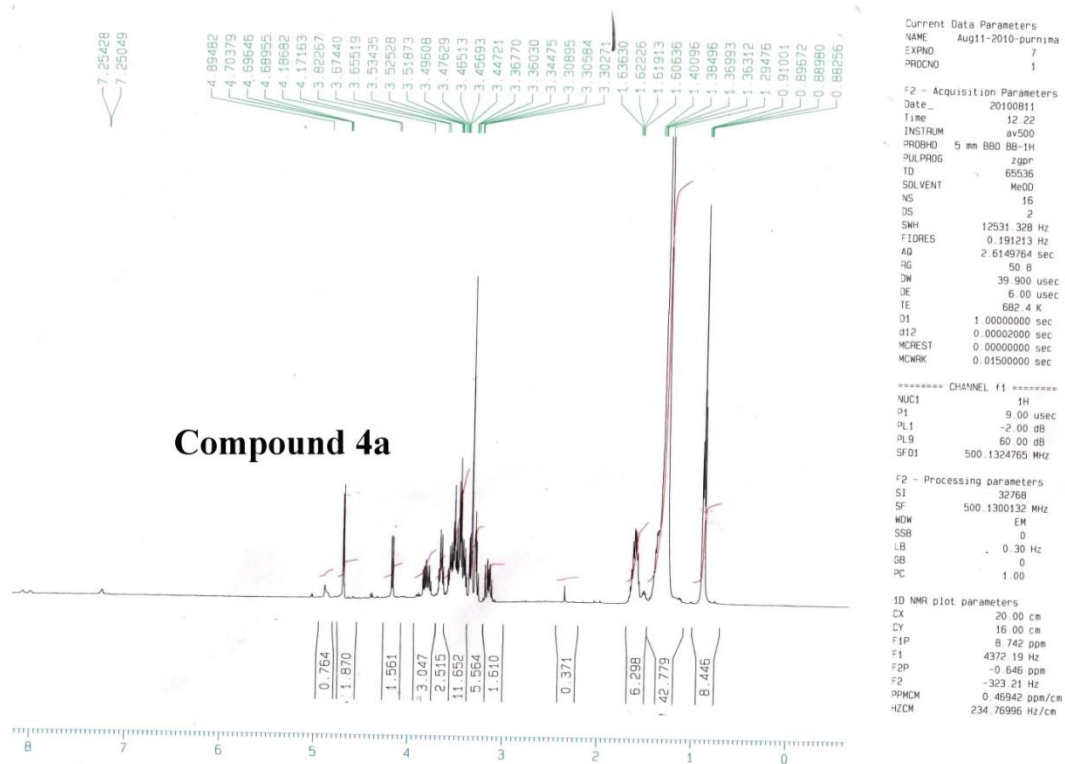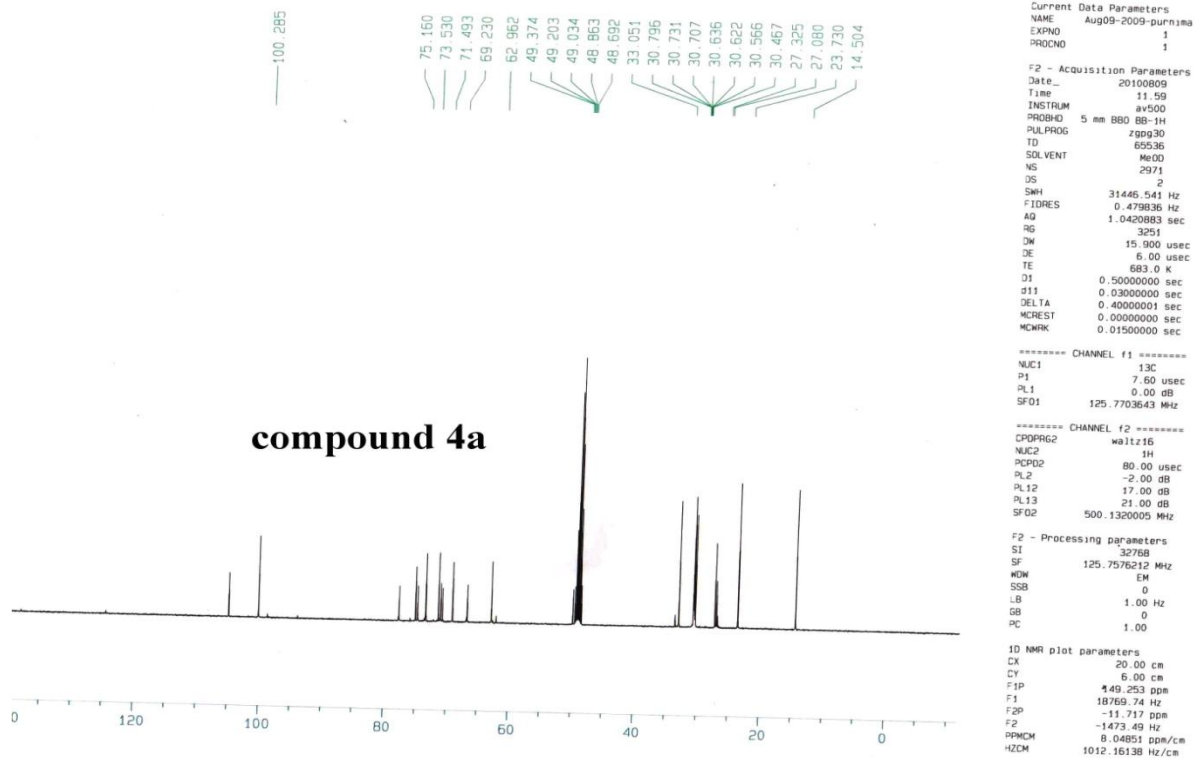

## Compound 4a

### Qualitative Compound Report

|                        |                   |               |                        |
|------------------------|-------------------|---------------|------------------------|
| Data File              | XD.d              | Sample Name   | XD                     |
| Sample Type            | Sample            | Position      | Vial 18                |
| Instrument Name        | Instrument 1      | User Name     |                        |
| Acq Method             | vishal_12-01-13.m | Acquired Time | 28-03-2013 PM 12:11:08 |
| IRM Calibration Status | Success           | DA Method     | SamplePurity-Default.m |
| Comment                |                   |               |                        |

|                |                             |       |
|----------------|-----------------------------|-------|
| Sample Group   |                             | Info. |
| Acquisition SW | 6200 series TOF/6500 series |       |
| Version        | Q-TOF B.05.01 (B5125)       |       |

#### Compound Table

| Compound Label        | RT    | Mass     | Formula       | MFG Formula   | MFG Diff (ppm) | DB Formula    |
|-----------------------|-------|----------|---------------|---------------|----------------|---------------|
| Cpd 68: C15 H29 Na O5 | 0.192 | 312.1914 | C15 H29 Na O5 | C15 H29 Na O5 | -0.51          | C15 H29 Na O5 |

| Compound Label        | m/z      | RT    | Algorithm                 | Mass     |
|-----------------------|----------|-------|---------------------------|----------|
| Cpd 68: C15 H29 Na O5 | 313.1988 | 0.192 | Find by Molecular Feature | 312.1914 |

#### MFE MS Spectrum

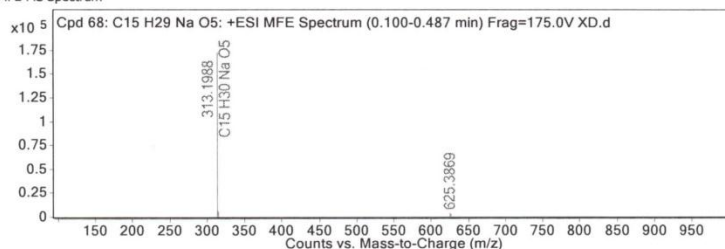

#### MS Spectrum Peak List

| m/z      | z | Abund     | Formula       | Ion     |
|----------|---|-----------|---------------|---------|
| 313.1988 | 1 | 172743.52 | C15 H30 Na O5 | (M+H)+  |
| 314.202  | 1 | 29838.8   | C15 H30 Na O5 | (M+H)+  |
| 315.2028 | 1 | 5677.93   | C15 H30 Na O5 | (M+H)+  |
| 625.3869 | 1 | 3661.21   |               | (2M+H)+ |
| 626.3885 | 1 | 2633.21   |               | (2M+H)+ |

#### Predicted Isotope Match Table

| Isotope | m/z      | Calc m/z | Diff (ppm) | Abund % | Calc Abund % | Abund Sum % | Calc Abund Sum % |
|---------|----------|----------|------------|---------|--------------|-------------|------------------|
| 1       | 313.1988 | 313.1985 | -0.74      | 100     | 100          | 82.95       | 83.96            |
| 2       | 314.202  | 314.202  | -0.16      | 17.27   | 16.76        | 14.33       | 14.07            |
| 3       | 315.2028 | 315.2043 | 4.67       | 3.29    | 2.34         | 2.73        | 1.97             |

--- End Of Report ---

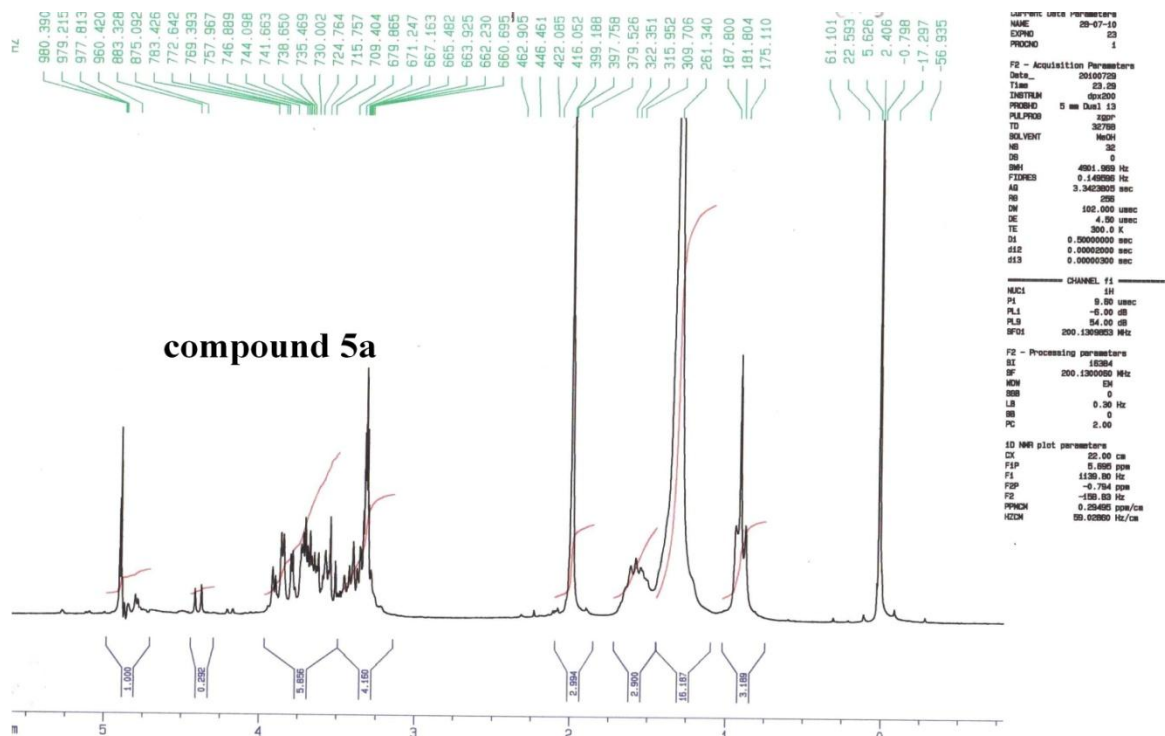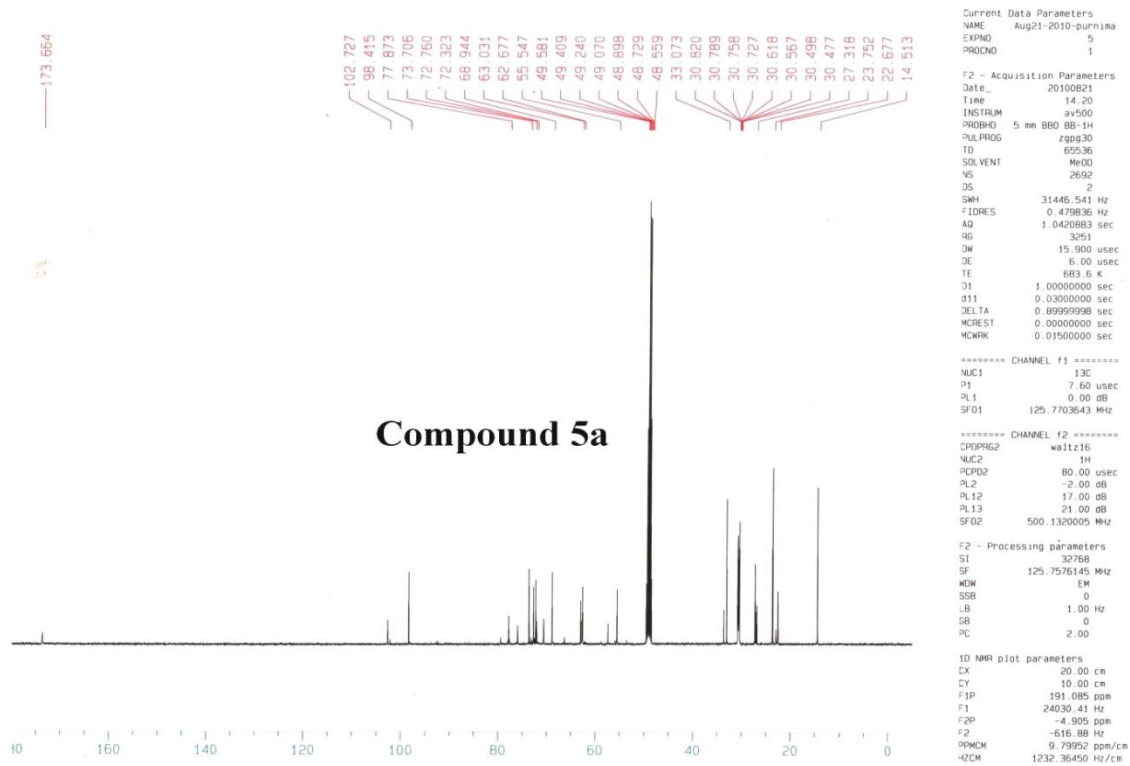



## Compound 5a

### Qualitative Compound Report

|                        |                   |               |                        |
|------------------------|-------------------|---------------|------------------------|
| Data File              | NAG0.d            | Sample Name   | NAG0.d                 |
| Sample Type            | Sample            | Position      | Vial 20                |
| Instrument Name        | Instrument 1      | User Name     |                        |
| Acq Method             | vishal_12-01-13.m | Acquired Time | 28-03-2013 PM 12:20:13 |
| IRM Calibration Status | Success           | DA Method     | SamplePurity-Default.m |
| Comment                |                   |               |                        |

|                |                             |
|----------------|-----------------------------|
| Sample Group   | Info.                       |
| Acquisition SW | 6200 series TOF/6500 series |
| Version        | Q-TOF B.05.01 (B5125)       |

#### Compound Table

| Compound Label       | RT    | Mass     | Formula      | MFG Formula  | MFG Diff (ppm) | DB Formula   |
|----------------------|-------|----------|--------------|--------------|----------------|--------------|
| Cpd 32: C18 H35 N O6 | 0.188 | 361.2467 | C18 H35 N O6 | C18 H35 N O6 | -0.74          | C18 H35 N O6 |

| Compound Label       | m/z      | RT    | Algorithm                 | Mass     |
|----------------------|----------|-------|---------------------------|----------|
| Cpd 32: C18 H35 N O6 | 362.2539 | 0.188 | Find by Molecular Feature | 361.2467 |

#### MFE MS Spectrum

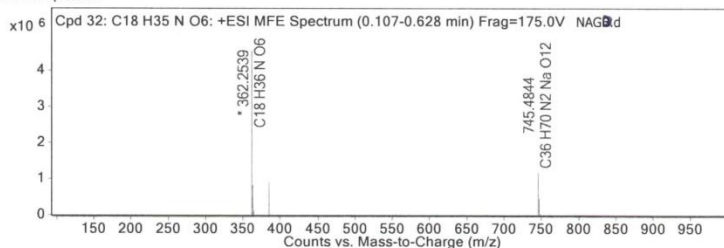

#### MS Spectrum Peak List

| m/z      | z | Abund      | Formula           | Ion      |
|----------|---|------------|-------------------|----------|
| 362.2539 | 1 | 4545140    | C18 H36 N O6      | (M+H)+   |
| 363.2577 | 1 | 816949.25  | C18 H36 N O6      | (M+H)+   |
| 364.2598 | 1 | 125287.3   | C18 H36 N O6      | (M+H)+   |
| 384.2363 | 1 | 907237.38  | C18 H35 N Na O6   | (M+Na)+  |
| 385.2392 | 1 | 172591.59  | C18 H35 N Na O6   | (M+Na)+  |
| 386.2417 | 1 | 25839.71   | C18 H35 N Na O6   | (M+Na)+  |
| 745.4844 | 1 | 1183643.88 | C36 H70 N2 Na O12 | (2M+Na)+ |
| 746.4876 | 1 | 465858.16  | C36 H70 N2 Na O12 | (2M+Na)+ |
| 747.4891 | 1 | 111986.63  | C36 H70 N2 Na O12 | (2M+Na)+ |
| 748.491  | 1 | 21673.11   | C36 H70 N2 Na O12 | (2M+Na)+ |

#### Predicted Isotope Match Table

| Isotope | m/z      | Calc m/z | Diff (ppm) | Abund % | Calc Abund % | Abund Sum % | Calc Abund Sum % |
|---------|----------|----------|------------|---------|--------------|-------------|------------------|
| 1       | 362.2539 | 362.2537 | -0.54      | 100     | 100          | 82.58       | 80.57            |
| 2       | 363.2577 | 363.257  | -1.79      | 17.97   | 20.48        | 14.84       | 16.5             |
| 3       | 364.2598 | 364.2594 | -0.99      | 2.76    | 3.22         | 2.28        | 2.6              |
| 4       | 365.2625 | 365.262  | -1.18      | 0.33    | 0.37         | 0.28        | 0.3              |
| 5       | 366.2645 | 366.2645 | -0.07      | 0.03    | 0.04         | 0.02        | 0.03             |

--- End Of Report ---



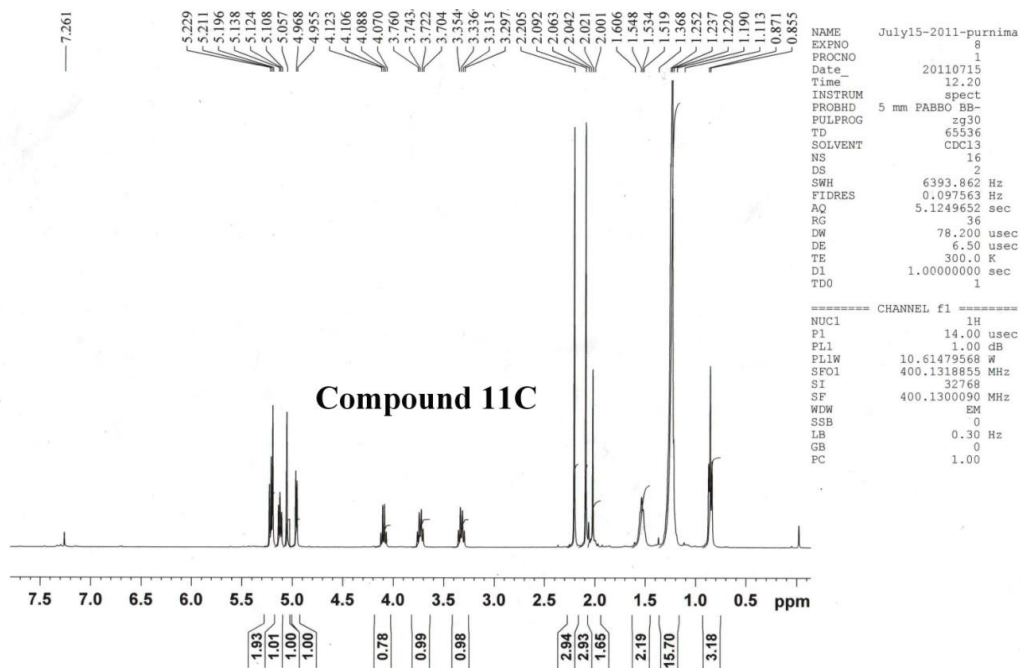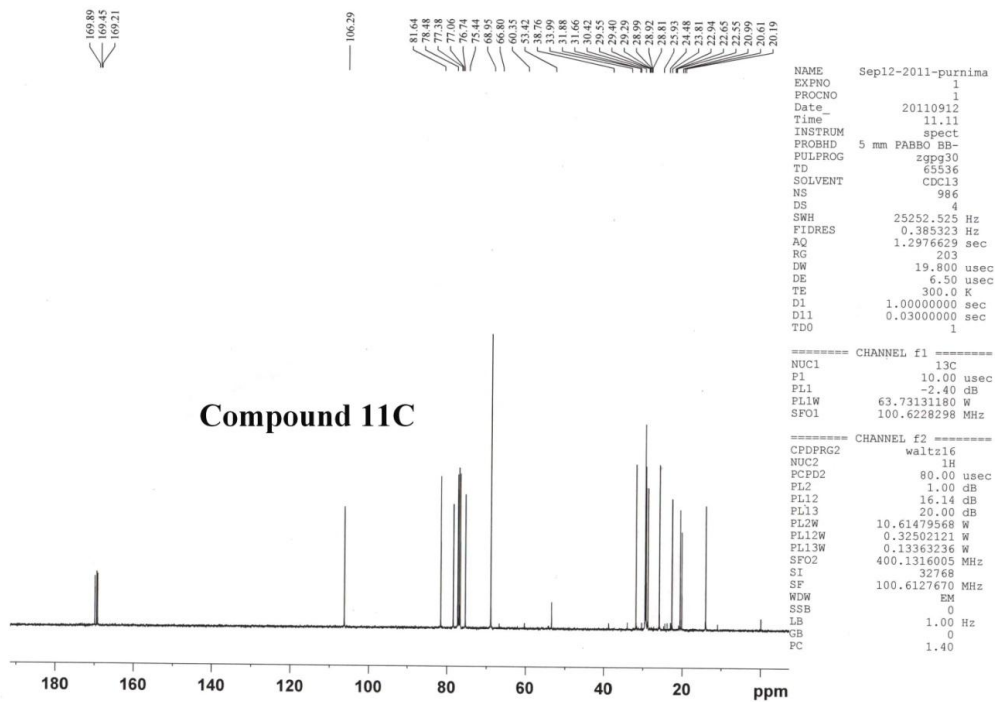

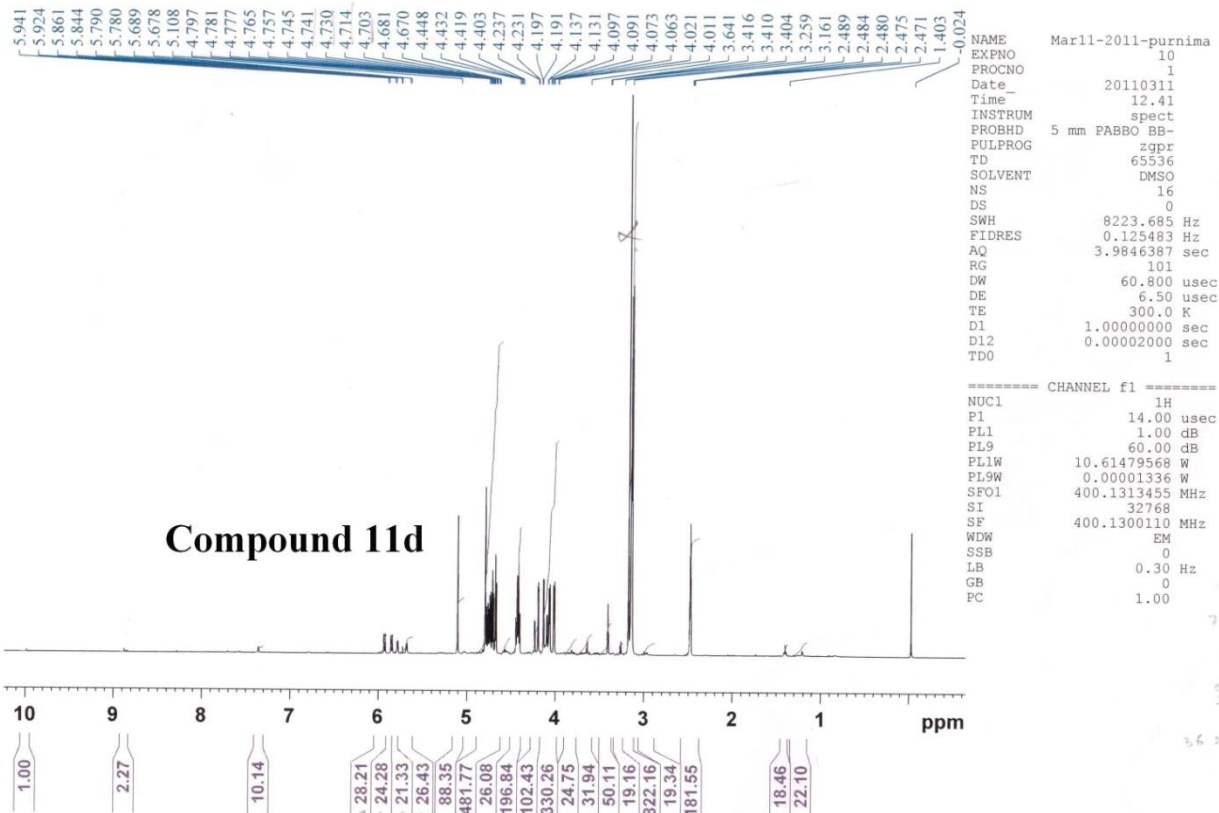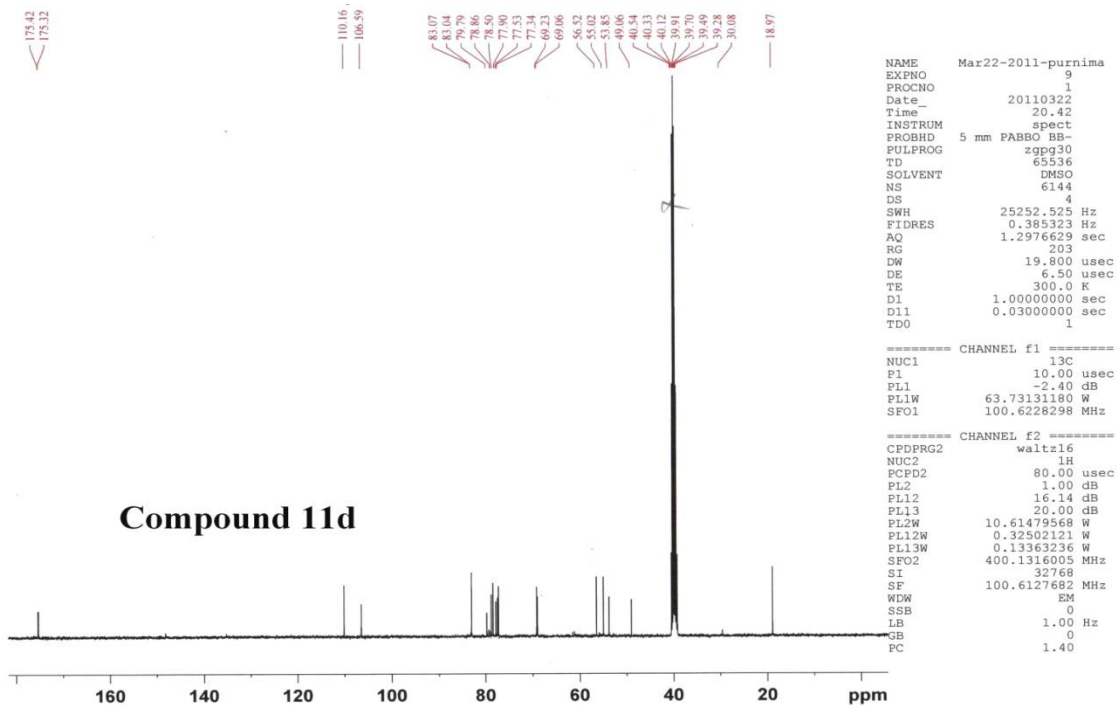

## Progress of reaction between propargyl alcohol and glucose at different time interval ( $^{13}\text{C}$ NMR of reaction mixture)

### 1. After 2hrs (mixture of furanoside and pyranoside latter with preponderance)

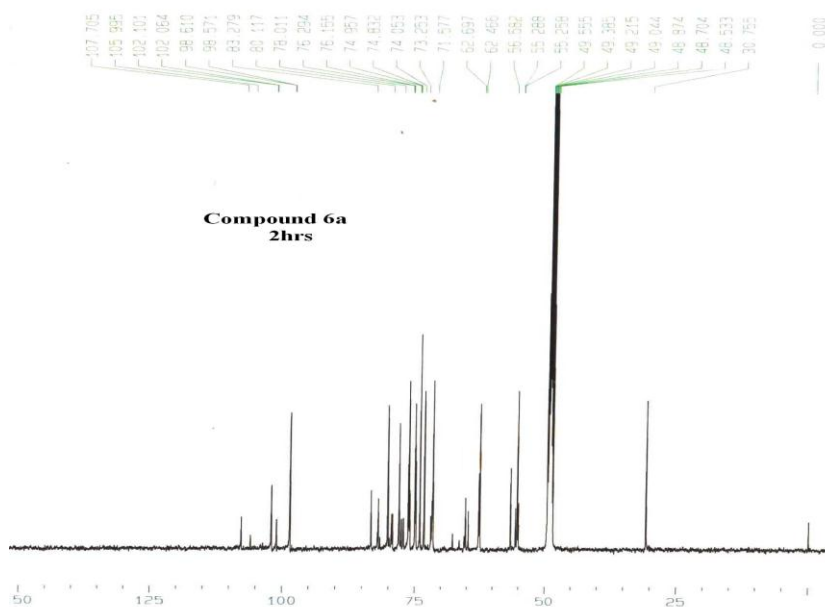

### 2. After 3 hrs (mixture of furanoside and pyranoside latter with preponderance)

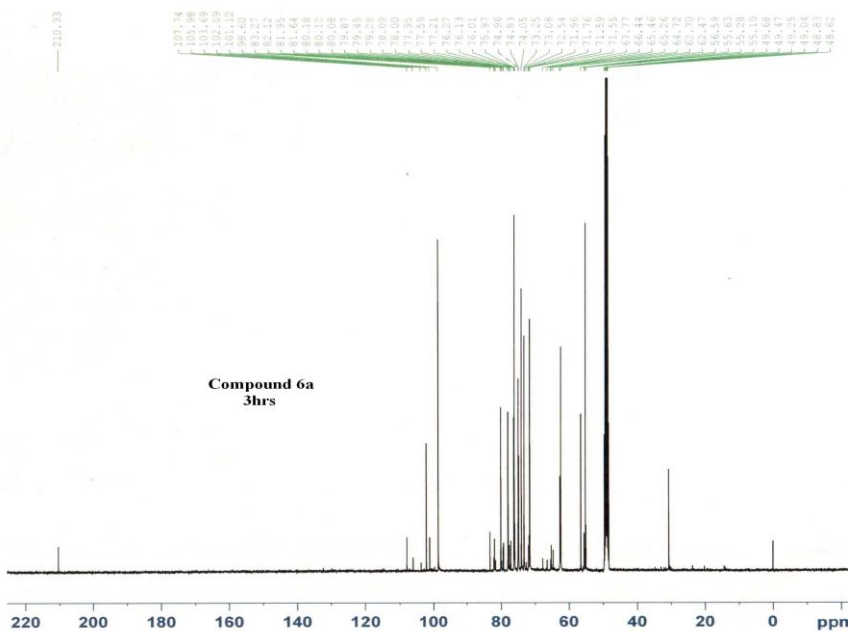

3. After 4hrs (mixture of furanoside and pyranoside latter with preponderance)

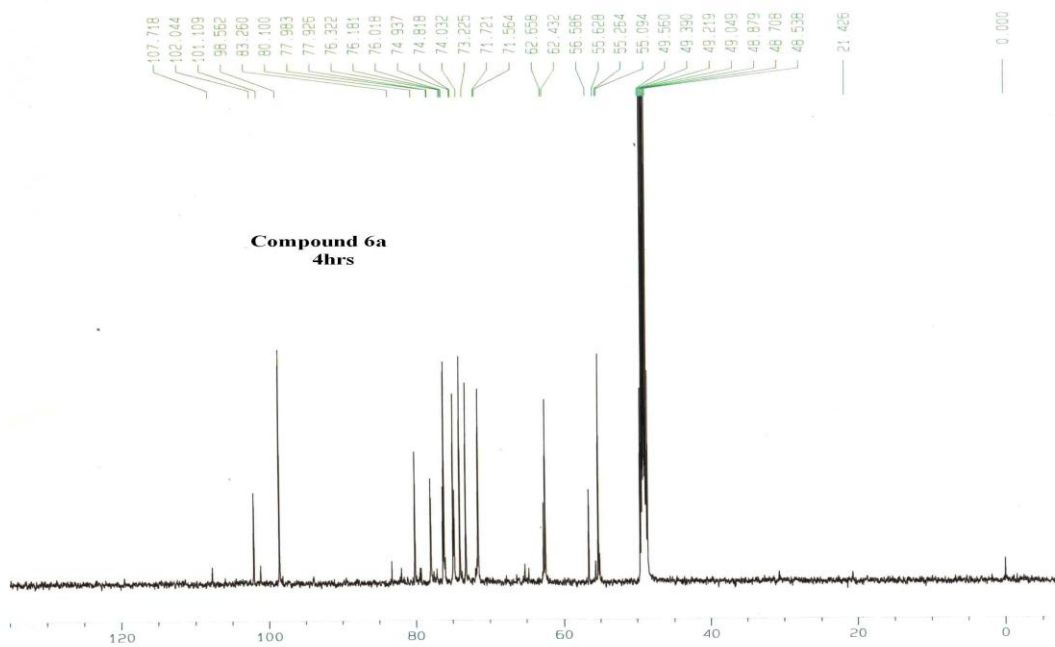

4. After 6hrs (only pyranoside)

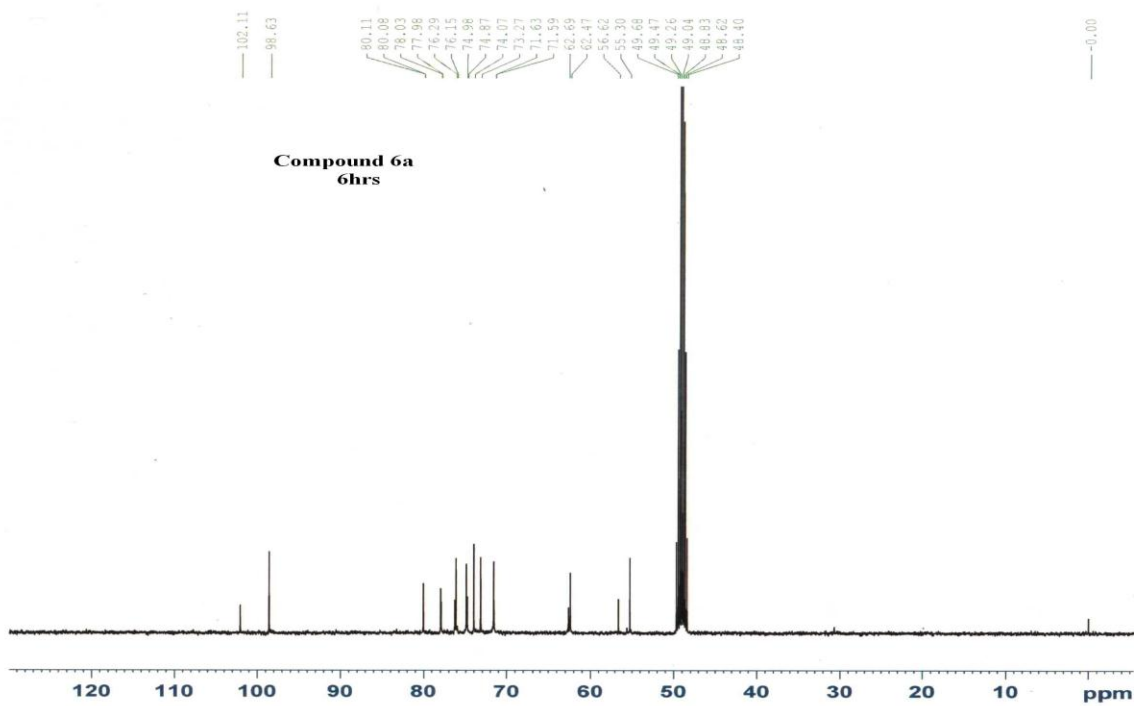

### 5. After 8hrs (only pyranoside)

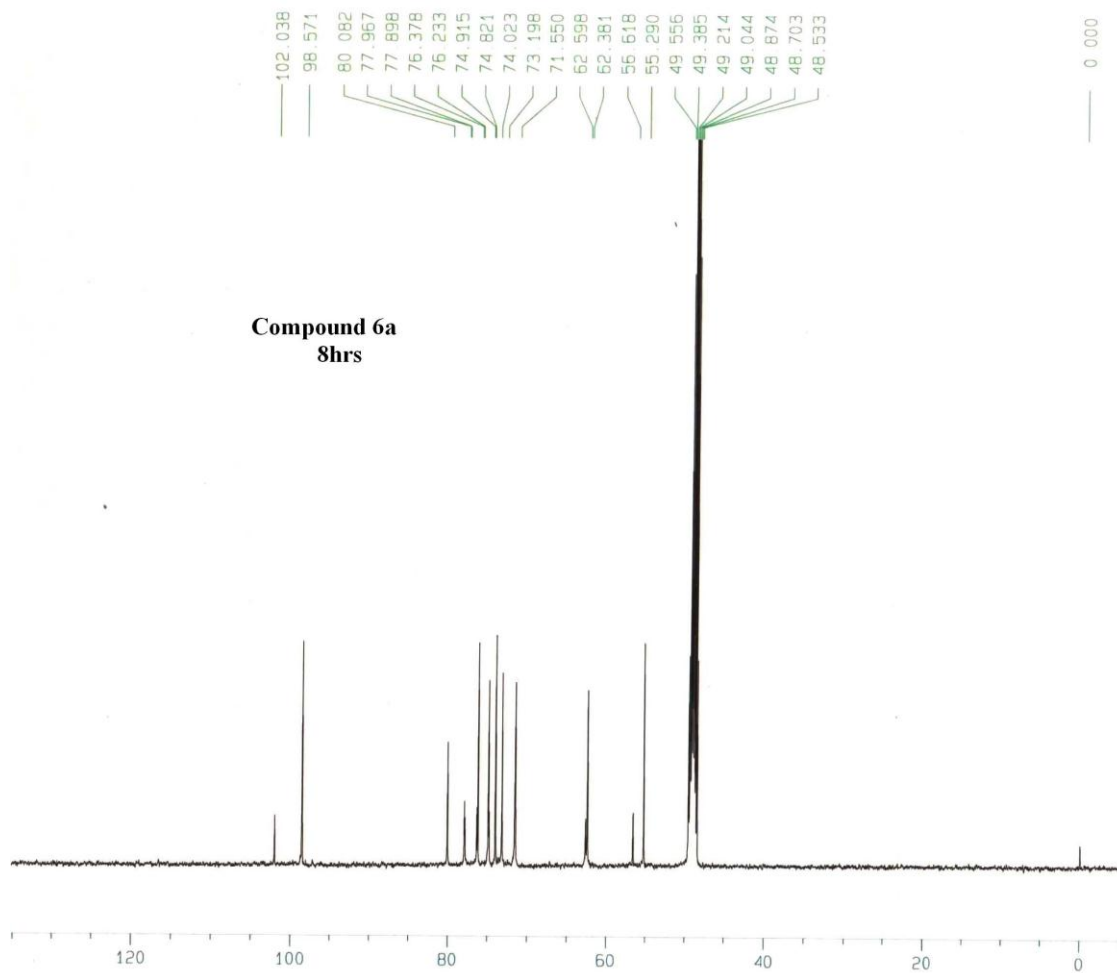

Supplement: c3ra41050a.pdf [file c3ra41050a.pdf]
